# Supplementary material for: Fibroblast growth factor receptor influences primary cilium length through an interaction with intestinal cell kinase
Source: PubMed Central journal article supplement — Proc Natl Acad Sci U S A. 2019 Feb 19;116(10):4316–25. doi: 10.1073/pnas.1800338116 (PMC6410813; doi:10.1073/pnas.1800338116), 2019-02-19
Supplement: pnas.1800338116.sapp.pdf [file pnas.1800338116.sapp.pdf]

## Supplementary Information for

Fibroblast growth factor receptor influences primary cilium length through an interaction with intestinal cell kinase

Michaela Kunova Bosakova, Alexandru Nita, Tomas Gregor, Miroslav Varecha, Iva Gudernova, Bohumil Faflek, Tomas Barta, Neha Basheer, Sara P. Abraham, Lukas Balek, Marketa Tomanova, Jana Fialova Kucerova, Juraj Bosak, David Potesil, Jennifer Zieba, Jieun Song, Peter Konik, Sohyun Park, Ivan Duran, Zbynek Zdrahal, David Smajs, Gert Jansen, Zheng Fu, Hyuk Wan Ko, Ales Hampl, Lukas Trantirek, Deborah Krakow\*, Pavel Krejci\*

Pavel Krejci

Email: [krejci@med.muni.cz](mailto:krejci@med.muni.cz)

Deborah Krakow

Email: [dkrakow@mednet.ucla.edu](mailto:dkrakow@mednet.ucla.edu)

### **This PDF file includes:**

Figs. S1 to S5

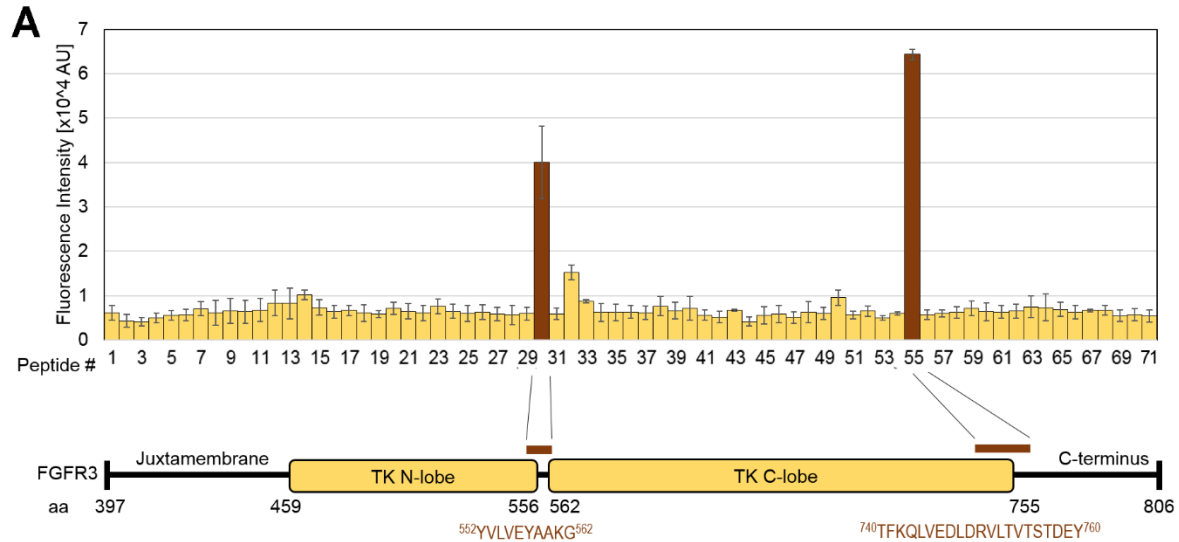

**B**

| Peptide # | Peptide sequence                      | Fluorescence | Peptide # | Peptide sequence                       | Fluorescence |
|-----------|---------------------------------------|--------------|-----------|----------------------------------------|--------------|
| 1         | $^{397}$ RLRSPPKKGLGSP $^{409}$       | 6182         | 37        | $^{590}$ TFKDLVSCAYQVARGMEYLA $^{611}$ | 6138         |
| 2         | $^{400}$ SPPKKGLGSPTVH $^{412}$       | 4314         | 38        | $^{590}$ TFKDLVSCAYQVARGMEYLA $^{609}$ | 7629         |
| 3         | $^{403}$ KKGLGSPTVHKIS $^{415}$       | 4106         | 39        | $^{612}$ KCIHRDLAARNVLVT $^{626}$      | 6606         |
| 4         | $^{406}$ LGSPVHKISRFP $^{418}$        | 4982         | 40        | $^{627}$ TEDNVMKIADFGL $^{638}$        | 7081         |
| 5         | $^{409}$ PTVHKISRFP $^{421}$          | 5550         | 41        | $^{630}$ NVMKIADFGLARD $^{641}$        | 5617         |
| 6         | $^{412}$ HKISRFP $^{424}$             | 5647         | 42        | $^{633}$ KIADFGLARDVHN $^{644}$        | 5181         |
| 7         | $^{415}$ SRFPLKRQVSLES $^{427}$       | 7046         | 43        | $^{636}$ DFGLARDVHNLDY $^{647}$        | 6670         |
| 8         | $^{418}$ PLKRQVSLESNAS $^{430}$       | 6104         | 44        | $^{639}$ LARDVHNLDDYK $^{650}$         | 4154         |
| 9         | $^{421}$ RQVSLESNASMSS $^{433}$       | 6550         | 45        | $^{642}$ DVHNLDDYKTTN $^{653}$         | 5494         |
| 10        | $^{424}$ SLESNASMSSNTP $^{436}$       | 6372         | 46        | $^{645}$ NLDYKTTNGRL $^{656}$          | 5860         |
| 11        | $^{427}$ SNASMSSNTP $^{439}$          | 6770         | 47        | $^{648}$ YKTTNGRLPVK $^{659}$          | 5111         |
| 12        | $^{430}$ SMSSNTP $^{442}$             | 8335         | 48        | $^{657}$ PVKWMAPEALFDRVY $^{671}$      | 6331         |
| 13        | $^{433}$ SNTPLVRIARLSS $^{445}$       | 8241         | 49        | $^{689}$ TLGGSPYPG $^{698}$            | 5915         |
| 14        | $^{436}$ PLVRIARLSSGEG $^{448}$       | 10174        | 50        | $^{699}$ PVEELFKLLKE $^{709}$          | 9525         |
| 15        | $^{439}$ RIARLSSGEGPTL $^{451}$       | 7331         | 51        | $^{710}$ GHRMDKPA $^{719}$             | 5642         |
| 16        | $^{442}$ RLSSGEGPTLANV $^{454}$       | 6352         | 52        | $^{720}$ THDLYMIMRECW $^{731}$         | 6490         |
| 17        | $^{445}$ SGEGPTLANVSEL $^{457}$       | 6694         | 53        | $^{732}$ HAAPSQR $^{739}$              | 4963         |
| 18        | $^{448}$ GPTLANVSELELP $^{460}$       | 6084         | 54        | $^{740}$ TFKQLVEDLDRVLT $^{754}$       | 5997         |
| 19        | $^{451}$ LANVSELELPADP $^{463}$       | 5899         | 55        | $^{740}$ TFKQLVEDLDRVLTSTDEY $^{760}$  | 64339        |
| 20        | $^{454}$ VSELELPADPKWE $^{466}$       | 7129         | 56        | $^{748}$ LDRVLTSTDEY $^{760}$          | 5661         |
| 21        | $^{457}$ LELPADPKWLSR $^{469}$        | 6475         | 57        | $^{751}$ VLTSTDEYLDL $^{763}$          | 5965         |
| 22        | $^{459}$ LPADPKWEL $^{467}$           | 6094         | 58        | $^{754}$ VTSTDEYLDLSAP $^{766}$        | 6255         |
| 23        | $^{468}$ SRARLTGKPLGE $^{480}$        | 7629         | 59        | $^{757}$ TDEYLDLSAPFEQ $^{769}$        | 7135         |
| 24        | $^{481}$ GCFGQVVM $^{491}$            | 6483         | 60        | $^{760}$ YLDLSAPFEQYSP $^{772}$        | 6385         |
| 25        | $^{492}$ IGIDKDRAAKP $^{502}$         | 6001         | 61        | $^{763}$ LSAPFEQYSPGGQ $^{775}$        | 6325         |
| 26        | $^{503}$ VTVAVKMLKDDA $^{514}$        | 6240         | 62        | $^{766}$ PFEQYSPGGQDTP $^{778}$        | 6493         |
| 27        | $^{515}$ TDKDLSDLVSEMEMMKMIG $^{533}$ | 5891         | 63        | $^{769}$ QYSPGGQDTPSSS $^{781}$        | 7493         |
| 28        | $^{533}$ GKHKNIN $^{540}$             | 5644         | 64        | $^{772}$ PGGQDTPSSSSS $^{784}$         | 7337         |
| 29        | $^{541}$ LLGACTQGGPL $^{551}$         | 5977         | 65        | $^{775}$ QDTPSSSSSGDDS $^{787}$        | 6882         |
| 30        | $^{552}$ YVLVEYAAKG $^{561}$          | 40066        | 66        | $^{778}$ PSSSSSGDDSVFA $^{790}$        | 6318         |
| 31        | $^{556}$ EYAAKGNLREFLRA $^{569}$      | 5912         | 67        | $^{781}$ SSSGDDSVFAHDL $^{793}$        | 6640         |
| 32        | $^{565}$ EFLRARRPPGLDY $^{577}$       | 15259        | 68        | $^{784}$ GDDSVFAHDLPP $^{796}$         | 6689         |
| 33        | $^{568}$ RARRPPGLDYSFD $^{580}$       | 8758         | 69        | $^{787}$ SVFAHDLPPAPP $^{799}$         | 5476         |
| 34        | $^{571}$ RPPGLDYSFD $^{583}$          | 6236         | 70        | $^{790}$ AHDLPPAPPSSG $^{802}$         | 5740         |
| 35        | $^{574}$ GLDYSFD $^{586}$             | 6215         | 71        | $^{793}$ LLPPAPPSSGSR $^{806}$         | 5400         |
| 36        | $^{577}$ YFD $^{589}$                 | 6335         |           |                                        |              |

**Figure S1** Mapping the FGFR3-ICK interaction using peptide microarray

(A) The intracellular part of FGFR3 was dissected into 71 overlapping peptides, and the peptide microarray was prepared and processed as detailed in Material and Methods. The fluorescence signal corresponds to ICK binding, and identified two ICK-binding peptides:  $^{552}$ YVLVEYAAKG $^{561}$ , and  $^{740}$ TFKQLVEDLDRVLTSTDEY $^{760}$ . TK, tyrosine kinase. (B) Table listing all peptides and the corresponding mean of fluorescence values. The ICK interacting peptides are highlighted

in red. The contribution of <sup>740</sup>TFKQLVEDLDRVLTVTSTDEY<sup>760</sup> to FGFR3-ICK interaction is further analyzed in the manuscript (Figs. 2, 3). The identification of additional ICK binding site (<sup>552</sup>YVLVEYAAKG<sup>562</sup>) in the kinase domain of FGFR3 is in discrepancy with the co-immunoprecipitation results, where all C-terminal truncated constructs failed to bind ICK, despite possessing the intact <sup>552</sup>YVLVEYAAKG<sup>562</sup> motif (Fig. 2B). It is likely that the <sup>552</sup>YVLVEYAAKG<sup>562</sup> motif is a weak binding site that is not sufficient alone to mediate the stable interaction between FGFR and ICK, necessary for co-immunoprecipitation.

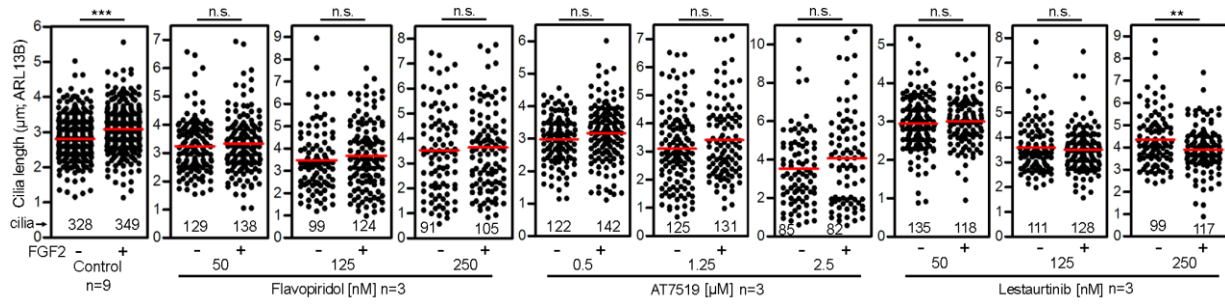

**Figure S2** Inhibition of Ick activity deregulates cilia length and blocks the FGF2-mediated cilia elongation. NIH3T3 cells were serum starved for 12 hours to produce cilia, and then treated with ICK inhibitors flavopiridol, AT7519 or lestaurtinib, in the presence or absence of 2 ng/ml FGF2 for additional 12 hours. Cilia were visualized by ARL13B immunostaining, measured in 3D and plotted. Black dots, individual cilia; red bars, medians (Student's t-test, \*\*\* $p < 0.001$ ); n.s., not significant.

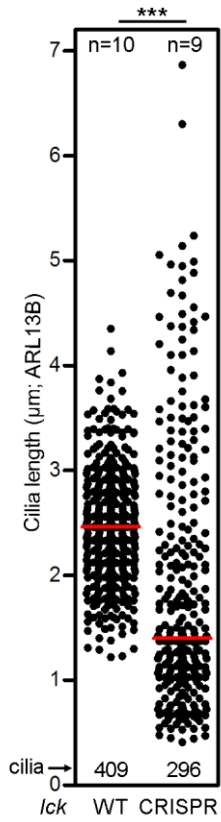

**Figure S3** *Ick*<sup>CRISPR</sup> NIH3T3 cells form cilia with extreme variability in length

NIH3T3 cells were serum starved (24-36 hours) before their cilia lengths were visualized by ARL13B immunostaining, measured and plotted. Black dots represent individual cilia; red bars show medians (Student's t-test, \*\*\* $p < 0.001$ ). Cilia of non-transfected FGF2-naïve wild-type (WT) and *Ick*<sup>CRISPR</sup> NIH3T3 cells from Figure 6 and Figure 7F were used to build the figure.

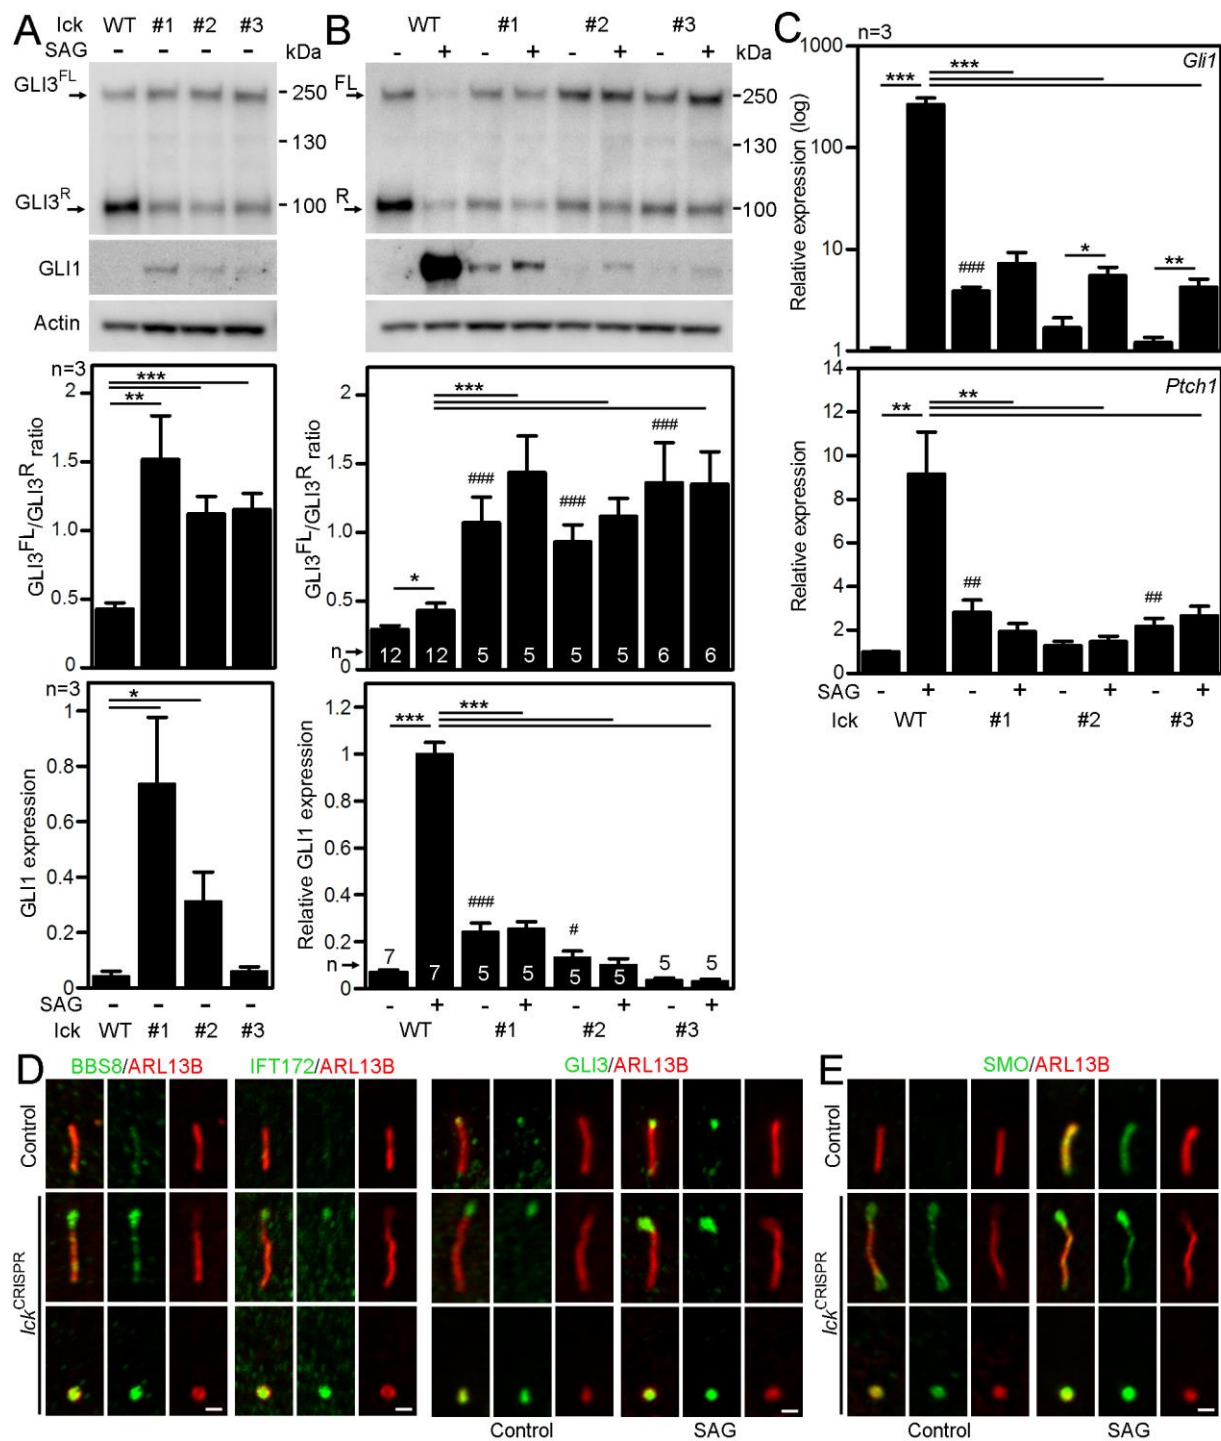

**Figure S4** *Ick*<sup>CRISPR</sup> NIH3T3 cells have deregulated IFT and Hedgehog signaling

(A) GLI3 expression in *Ick*<sup>CRISPR</sup> cells (clones #1, #2, and #3), analyzed by western blot. *Ick*<sup>CRISPR</sup> cells show increased full length GLI3 (FL) to repressor (R) ratio, and upregulate GLI1, compared to wild-type (WT) NIH3T3 cells (Student's t-test, \* $p < 0.05$ , \*\* $p < 0.01$ , \*\*\* $p < 0.001$ ). Actin was used as a loading control and for normalization of GLI1 expression. (B-C) *Ick*<sup>CRISPR</sup> cells do not process GLI3 upon treatment with SAG, as evidenced by no changes in GLI3<sup>FL</sup>/GLI3<sup>R</sup> ratios, fail to activate GLI1 expression in western blots (B), and *Gli1* and *Ptch1* expression in qRT-PCR (C) (statistical significance - # among untreated cells, \* among SAG treated cells). (D) Cilia of *Ick*<sup>CRISPR</sup> cells aberrantly accumulate BBS8, IFT172 and GLI3 in their bulged tips. (E) In the absence of SAG, *Ick*<sup>CRISPR</sup> cells translocate Smoothed (SMO) to cilia in contrast to

WT cells that do so only in response to SAG treatment.

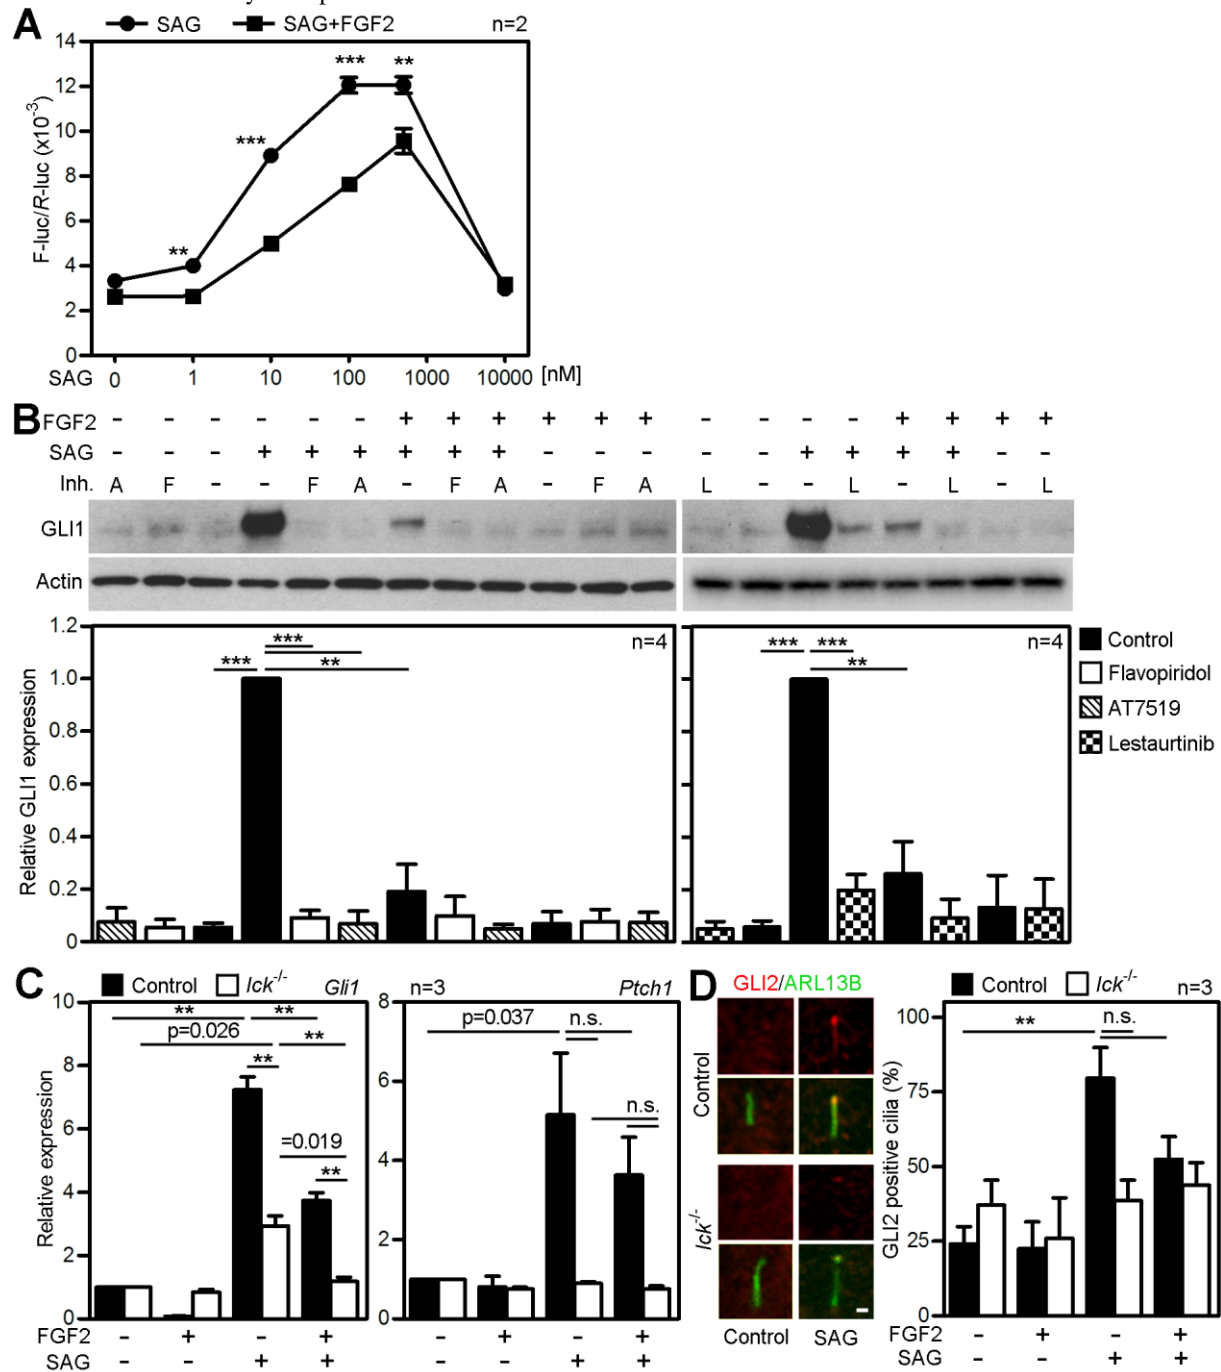

**Figure S5** Downregulation of Ick activity inhibits Hh signaling

(A) Serum starved Shh-LIGHT2 NIH3T3 cells were treated with increasing concentrations of SAG. FGF2 inhibited the SAG-mediated transactivation of the Hh reporter (Student's t-test, \*\* $p < 0.01$ , \*\*\* $p < 0.001$ ). (B) Inhibition of ICK activity by 125 nM flavopiridol (F), 1.25  $\mu$ M AT7519 (A), 125 nM lestaurtinib (L) or by FGF2 blocks the SAG-mediated GLI1 expression in NIH3T3 cells. Actin was used as a loading control, and for normalization of GLI1 expression. (C) Micromasses produced from limb buds of *Ick*<sup>-/-</sup> E12 mice have inhibited SAG-mediated expression of *Gli1* and *Ptch1*, compared to the *Ick*<sup>+/+</sup> littermates (control) that inhibit SAG-mediated *Gli1* expression upon FGF2. (D) *Ick*<sup>-/-</sup> micromasses failed to efficiently shuttle GLI2 to cilia as a response to SAG, similar to FGF2-treated control micromasses. Cells were stained by ARL13B and GLI2 antibodies, and the percentage of GLI2-positive cilia was scored (scale bar 1  $\mu$ m).
